# Supplementary material
Source: publisher site journal article supplement (https://www.dovepress.com/article/448422)
Supplement: Supplementary file 1 [file get_supplementary_file.php]

Supplementary file 1:

**Knowledge, Attitude and Practice toward Artificial Intelligence among Healthcare Workers in Private Polyclinics in Jeddah, Saudi Arabia**

Questionnaire

| **S: No:** | **Question** | **Response** | **Comments** |
| --- | --- | --- | --- |
| **Section I- Demographic and Professional information** | | |
|  | Age | _______years |  |
|  | Gender | 1. Male 2. Female |  |
|  | Place of Residence |  |  |
|  | Occupation | 1. Healthcare worker 2. Administrative employee in business enterprise |  |
|  | Job type | 1. Physician 2. Nurse 3. Administrative staff 4. Others Specify _________ |  |
|  | Professional Qualification | 1. Graduate 2. Postgraduate (any degree after graduation) 3. Diploma 4. Others Specify _________ |  |
|  | Duration of experience (in years) |  |  |
|  | **Section II- Knowledge about Artificial intelligence (AI)** | | |
|  | Do you agree that you have good familiarity with artificial intelligence? | 1. Strongly agree 2. Agree 3. Don’t know 4. Disagree 5. Strongly disagree |  |
|  | I have an understanding of the basic computational principle of AI. | 1. Strongly agree 2. Agree 3. Don’t know 4. Disagree 5. Strongly disagree |  |
|  | I am comfortable with the nomenclature of AI. | 1. Strongly agree 2. Agree 3. Don’t know 4. Disagree 5. Strongly disagree |  |
|  | I have an understanding of the limitations of AI. | 1. Strongly agree 2. Agree 3. Don’t know 4. Disagree 5. Strongly disagree |  |
|  | AI abilities are superior to human experience? | 1. Strongly agree 2. Agree 3. Don’t know 4. Disagree 5. Strongly disagree |  |
|  | Do you agree that artificial intelligence has useful applications in the medical field? | 1. Strongly agree 2. Agree 3. Don’t know 4. Disagree 5. Strongly disagree |  |
|  | How many applications of AI have you come across in your work? | 1. None 2. One 3. Two to four 4. More than four |  |
|  | Do you know the difference between machine learning and deep learning? | 1. Not at all 2. I only know one term 3. I know both terms but the difference is not clear to me 4. I know both terms and the difference is clear to me |  |
|  | How often do you use speech recognition or transcription applications? | 1. Never 2. Rarely 3. Weekly 4. On a daily basis |  |
|  | **Section III- Attitude / PERCEPTIONS RELATED TO ARTIFICIAL INTELLIGENCE (AI)** | | |
|  | How useful do you think AI could be in your area of work (medical field or business enterprise)? | 1. Extremely useful 2. Useful 3. Of limited use 4. Of no use at all |  |
|  | Do you agree that the diagnostic ability of AI is superior to the clinical experience of a human doctor? | 1. Strongly agree 2. Agree 3. Don’t know 4. Disagree 5. Strongly disagree |  |
|  | AI can help reduce the number of medical errors. | 1. Strongly agree 2. Agree 3. Don’t know 4. Disagree 5. Strongly disagree |  |
|  | AI can deliver clinically relevant, vast amounts of high-quality data in real time. | 1. Strongly agree 2. Agree 3. Don’t know 4. Disagree 5. Strongly disagree |  |
|  | AI has no emotional exhaustion or physical limitation. | 1. Strongly agree 2. Agree 3. Don’t know 4. Disagree 5. Strongly disagree |  |
|  | How worried are you that AI will replace you at your job? | 1. Extremely worried 2. Moderately worried 3. Mildly worried 4. Not worried at all |  |
|  | Do you agree that you would always use AI when making medical decisions in the future? | 1. Strongly agree 2. Agree 3. Don’t know 4. Disagree 5. Strongly disagree |  |
|  | If your medical judgment and an artificial intelligence’s judgments differ which will you follow? | 1. Physician’s opinion 2. Artificial intelligence opinion 3. Patient’s choice |  |
|  | In which field of medicine do you think artificial intelligence will be most useful? | 1. Making a diagnosis 2. Making treatment decisions 3. Direct treatment (including surgery) 4. Biopharmaceutical research and development 5. Providing medical assistance in underserved areas 6. Development of social insurance program |  |
|  | Which sector of healthcare do you think will be the first to commercialize artificial intelligence? | 1. Public primary care such as public health centers 2. Primary care in private clinics 3. Specialized clinics (spine, knee, obstetrics and gynecology, etc.) 4. University hospitals |  |
|  | What are you concerned about application of AI in medicine? | 1. It cannot be used to provide opinions in unpredicted situations due to inadequate information 2. It is not flexible enough to be applied to every patient 3. It is difficult to apply to controversial subjects 4. The low ability to sympathize and consider the emotional well-being of the patient 5. It is developed by a specialist with little clinical experience in medical practice |  |
|  | Do you think there may be serious privacy issues with the use of AI? | 1. Strongly agree 2. Agree 3. Don’t know 4. Disagree 5. Strongly disagree |  |
|  | **Section IV- The application of ARTIFICIAL INTELLIGENCE (AI)** | | |
|  | AI cannot be used to provide opinions in unexpected situations. | 1. Strongly agree 2. Agree 3. Don’t know 4. Disagree 5. Strongly disagree |  |
|  | AI is not flexible enough to be applied to every patient. | 1. Strongly agree 2. Agree 3. Don’t know 4. Disagree 5. Strongly disagree |  |
|  | AI has low ability to sympathize and consider the emotional well-being of the patient. | 1. Strongly agree 2. Agree 3. Don’t know 4. Disagree 5. Strongly disagree |  |
|  | AI was developed by a specialist with little clinical experience in medical practice. | 1. Strongly agree 2. Agree 3. Don’t know 4. Disagree 5. Strongly disagree |  |

**Thank you very much for your time**
